# Supplementary material
Source: publisher site journal article supplement (https://www.dovepress.com/article/484377)
Supplement: Supplementary file 1 [file get_supplementary_file.php]

**Supplementary Material**

**Supplementary Table 1**

**s-Table 1-A** Assessing the Correlation between PSG indicators and **Sobs** using Multi-model Linear Regression

| Variables | Unadjusted Model | |  | Model 1 | |  | Model 2 | |
| --- | --- | --- | --- | --- | --- | --- | --- | --- |
| β (95%CI) | P | β (95%CI) | P | β (95%CI) | P |
| T90% | -159.15  (-267.76 ~ -50.53) | **0.005** |  | -248.76  (-440.06 ~ -57.46) | **0.012** |  | -239.19  (-434.56 ~ -43.83) | **0.018** |
| AHI | -0.49 (-1.04 ~ 0.06) | 0.083 |  | -0.24 (-1.06 ~ 0.57) | 0.560 |  | -0.30 (-1.14 ~ 0.54) | 0.487 |
| Lowest SPO2 | 0.71 (-0.49 ~ 1.91) | 0.246 |  | -1.47 (-3.64 ~ 0.71) | 0.190 |  | -1.33 (-3.59 ~ 0.94) | 0.253 |
| Mean SPO2 | 3.79 (-1.30 ~ 8.89) | 0.147 |  | -1.17 (-11.12 ~ 8.78) | 0.818 |  | -2.40 (-12.71 ~ 7.92) | 0.650 |

Model 1: was adjusted for the other three indicators except for the indicator in the unadjusted mode.

Model 2: was adjusted for variables included in Model 1, age, BMI, waist circumference and metabolic syndrome.

**s-Table 1-B** Assessing the Correlation between PSG indicators and **Chao1** using Multi-model Linear Regression

| Variables | Unadjusted Model | |  | Model 1 | |  | Model 2 | |
| --- | --- | --- | --- | --- | --- | --- | --- | --- |
| β (95%CI) | P | β (95%CI) | P | β (95%CI) | P |
| T90% | -189.62  (-316.01 ~ -63.23) | **0.004** |  | -251.20  (-473.89 ~ -28.51) | **0.029** |  | -235.64  (-462.42 ~ -8.87) | **0.044** |
| AHI | -0.75 (-1.38 ~ -0.11) | **0.023** |  | -0.60 (-1.56 ~ 0.35) | 0.218 |  | -0.66 (-1.64 ~ 0.32) | 0.189 |
| Lowest SPO2 | 1.11 (-0.28 ~ 2.50) | 0.121 |  | -1.05 (-3.59 ~ 1.48) | 0.417 |  | -0.86 (-3.48 ~ 1.77) | 0.523 |
| Mean SPO2 | 4.43 (-1.52 ~ 10.38) | 0.147 |  | -4.04 (-15.62 ~ 7.54) | 0.495 |  | -5.42 (-17.39 ~ 6.55) | 0.377 |

Model 1: was adjusted for the other three indicators except for the indicator in the unadjusted mode.

Model 2: was adjusted for variables included in Model 1, age, BMI, waist circumference and metabolic syndrome.

**s-Table 1-C** Assessing the Correlation between PSG indicators and **Ace** using Multi-model Linear Regression

| Variables | Unadjusted Model | |  | Model 1 | |  | Model 2 | |
| --- | --- | --- | --- | --- | --- | --- | --- | --- |
| β (95%CI) | P | β (95%CI) | P | β (95%CI) | P |
| T90% | -179.82  (-299.71 ~ -59.92) | **0.004** |  | -251.97  (-463.81 ~ -40.12) | **0.022** |  | -238.11  (-454.60 ~ -21.63) | **0.033** |
| AHI | -0.63 (-1.23 ~ -0.02) | **0.044** |  | -0.40 (-1.31 ~ 0.51) | 0.392 |  | -0.47 (-1.40 ~ 0.47) | 0.328 |
| Lowest SPO2 | 1.01 (-0.31 ~ 2.33) | 0.137 |  | -1.01 (-3.42 ~ 1.40) | 0.413 |  | -0.76 (-3.26 ~ 1.75) | 0.555 |
| Mean SPO2 | 4.18 (-1.46 ~ 9.82) | 0.149 |  | -3.23 (-14.25 ~ 7.78) | 0.566 |  | -4.33 (-15.76 ~ 7.10) | 0.460 |

Model 1: was adjusted for the other three indicators except for the indicator in the unadjusted mode.

Model 2: was adjusted for variables included in Model 1, age, BMI, waist circumference and metabolic syndrome.

**s-Table 1-D** Assessing the Correlation between PSG indicators and **Shannon** using Multi-model Linear Regression

| Variables | Unadjusted Model | |  | Model 1 | |  | Model 2 | |
| --- | --- | --- | --- | --- | --- | --- | --- | --- |
| β (95%CI) | P | β (95%CI) | P | β (95%CI) | P |
| T90% | -0.81 (-1.87 ~ 0.25) | 0.136 |  | -1.47 (-3.34 ~ 0.40) | 0.126 |  | -1.64 (-3.50 ~ 0.23) | 0.088 |
| AHI | -0.00 (-0.01 ~ 0.00) | 0.805 |  | 0.00 (-0.00 ~ 0.01) | 0.437 |  | 0.00 (-0.01 ~ 0.01) | 0.536 |
| Lowest SPO2 | 0.00 (-0.01 ~ 0.01) | 0.605 |  | -0.01 (-0.03 ~ 0.01) | 0.440 |  | -0.01 (-0.03 ~ 0.01) | 0.290 |
| Mean SPO2 | 0.02 (-0.03 ~ 0.07) | 0.387 |  | 0.02 (-0.08 ~ 0.12) | 0.677 |  | -0.00 (-0.10 ~ 0.10) | 0.961 |

Model 1: was adjusted for the other three indicators except for the indicator in the unadjusted mode.

Model 2: was adjusted for variables included in Model 1, age, BMI, waist circumference and metabolic syndrome.

**s-Table 1-E** Assessing the Correlation between PSG indicators and **Simpson** using Multi-model Linear Regression

| Variables | Unadjusted Model | |  | Model 1 | |  | Model 2 | |
| --- | --- | --- | --- | --- | --- | --- | --- | --- |
| β (95%CI) | P | β (95%CI) | P | β (95%CI) | P |
| T90% | 0.02 (-0.18 ~ 0.23) | 0.837 |  | 0.09 (-0.27 ~ 0.45) | 0.623 |  | 0.13 (-0.24 ~ 0.49) | 0.496 |
| AHI | -0.00 (-0.00 ~ 0.00) | 0.563 |  | -0.00 (-0.00 ~ 0.00) | 0.366 |  | -0.00 (-0.00 ~ 0.00) | 0.418 |
| Lowest SPO2 | 0.00 (-0.00 ~ 0.00) | 0.707 |  | 0.00 (-0.00 ~ 0.01) | 0.385 |  | 0.00 (-0.00 ~ 0.01) | 0.227 |
| Mean SPO2 | -0.00 (-0.01 ~ 0.01) | 0.827 |  | -0.01 (-0.03 ~ 0.01) | 0.343 |  | -0.01 (-0.02 ~ 0.01) | 0.577 |

Model 1: was adjusted for the other three indicators except for the indicator in the unadjusted mode.

Model 2: was adjusted for variables included in Model 1, age, BMI, waist circumference and metabolic syndrome.

**s-Table 1-F** Assessing the Correlation between PSG indicators and the abundance of **Faecalibacterium** using Multi-model Linear Regression

| Variables | Unadjusted Model | |  | Model 1 | |  | Model 2 | |
| --- | --- | --- | --- | --- | --- | --- | --- | --- |
| β (95%CI) | P | β (95%CI) | P | β (95%CI) | P |
| T90% | -0.14 (-0.27 ~ -0.01) | **0.046** |  | -0.11 (-0.35 ~ 0.13) | 0.390 |  | -0.12 (-0.37 ~ 0.12) | 0.326 |
| AHI | -0.00 (-0.00 ~ 0.00) | 0.152 |  | 0.00 (-0.00 ~ 0.00) | 0.637 |  | 0.00 (-0.00 ~ 0.00) | 0.637 |
| Lowest SPO2 | 0.01 (0.01 ~ 0.01) | **0.025** |  | 0.00 (-0.00 ~ 0.00) | 0.373 |  | 0.00 (-0.00 ~ 0.00) | 0.541 |
| Mean SPO2 | 0.01 (-0.00 ~ 0.01) | 0.083 |  | -0.00 (-0.01 ~ 0.01) | 0.846 |  | -0.00 (-0.01 ~ 0.01) | 0.816 |

Model 1: was adjusted for the other three indicators except for the indicator in the unadjusted mode.

Model 2: was adjusted for variables included in Model 1, age, BMI, waist circumference and metabolic syndrome.

**s-Table 1-G** Assessing the Correlation between PSG indicators and the abundance of **Verrucomicrobia** using Multi-model Linear Regression

| Variables | Unadjusted Model | |  | Model 1 | |  | Model 2 | |
| --- | --- | --- | --- | --- | --- | --- | --- | --- |
| β (95%CI) | P | β (95%CI) | P | β (95%CI) | P |
| T90% | -0.00 (-0.01 ~ 0.00) | 0.302 |  | 0.00 (-0.01 ~ 0.02) | 0.561 |  | 0.00 (-0.01 ~ 0.02) | 0.701 |
| AHI | -0.00 (-0.00 ~ 0.00) | 0.511 |  | 0.00 (-0.00 ~ 0.00) | 0.486 |  | 0.00 (-0.00 ~ 0.00) | 0.439 |
| Lowest SPO2 | 0.00 (-0.00 ~ 0.00) | 0.124 |  | 0.00 (-0.00 ~ 0.00) | 0.421 |  | 0.00 (-0.00 ~ 0.00) | 0.639 |
| Mean SPO2 | 0.00 (-0.00 ~ 0.00) | 0.119 |  | 0.00 (-0.00 ~ 0.00) | 0.289 |  | 0.00 (-0.00 ~ 0.00) | 0.352 |

Model 1: was adjusted for the other three indicators except for the indicator in the unadjusted mode.

Model 2: was adjusted for variables included in Model 1, age, BMI, waist circumference and metabolic syndrome.

**s-Table 1-H** Assessing the Correlation between PSG indicators and the abundance of **Gemmiger** using Multi-model Linear Regression

| Variables | Unadjusted Model for Sobs | |  | Model 1 | |  | Model 2 | |
| --- | --- | --- | --- | --- | --- | --- | --- | --- |
| β (95%CI) | P | β (95%CI) | P | β (95%CI) | P |
| T90% | -0.06 (-0.12 ~ -0.01) | **0.039** |  | -0.14 (-0.24 ~ -0.04) | **0.007** |  | -0.13 (-0.24 ~ -0.03) | **0.013** |
| AHI | -0.00 (-0.00 ~ 0.00) | 0.085 |  | -0.00 (-0.00 ~ 0.00) | 0.097 |  | -0.00 (-0.00 ~ 0.00) | 0.075 |
| Lowest SPO2 | 0.00 (-0.00 ~ 0.00) | 0.797 |  | -0.00 (-0.00 ~ 0.00) | 0.079 |  | -0.00 (-0.00 ~ 0.00) | 0.156 |
| Mean SPO2 | 0.00 (-0.00 ~ 0.00) | 0.547 |  | -0.00 (-0.01 ~ 0.00) | 0.225 |  | -0.00 (-0.01 ~ 0.00) | 0.197 |

Model 1: was adjusted for the other three indicators except for the indicator in the unadjusted mode.

Model 2: was adjusted for variables included in Model 1, age, BMI, waist circumference and metabolic syndrome.

**s-Table 1-I** Assessing the Correlation between PSG indicators and the abundance of **Candidatus_Saccharibacteria** using Multi-model Linear Regression

| Variables | Unadjusted Model for Sobs | |  | Model 1 | |  | Model 2 | |
| --- | --- | --- | --- | --- | --- | --- | --- | --- |
| β (95%CI) | P | β (95%CI) | P | β (95%CI) | P |
| T90% | -0.00 (-0.00 ~ 0.00) | 0.294 |  | -0.00 (-0.00 ~ 0.00) | 0.718 |  | -0.00 (-0.00 ~ 0.00) | 0.760 |
| AHI | -0.00 (-0.00 ~ 0.00) | 0.555 |  | 0.00 (-0.00 ~ 0.00) | 0.676 |  | 0.00 (-0.00 ~ 0.00) | 0.653 |
| Lowest SPO2 | 0.00 (-0.00 ~ 0.00) | 0.304 |  | 0.00 (-0.00 ~ 0.00) | 0.814 |  | 0.00 (-0.00 ~ 0.00) | 0.814 |
| Mean SPO2 | 0.00 (-0.00 ~ 0.00) | 0.254 |  | 0.00 (-0.00 ~ 0.00) | 0.749 |  | 0.00 (-0.00 ~ 0.00) | 0.699 |
| Model 1: was adjusted for the other three indicators except for the indicator in the unadjusted mode.  Model 2: was adjusted for variables included in Model 1, age, BMI, waist circumference and metabolic syndrome. | | | | | | | | |

**s-Table 1-J** Assessing the Correlation between PSG indicators and the abundance of **Gemmiger_formicilis** using Multi-model Linear Regression

| Variables | Unadjusted Model for Sobs | |  | Model 1 | |  | Model 2 | |
| --- | --- | --- | --- | --- | --- | --- | --- | --- |
| β (95%CI) | P | β (95%CI) | P | β (95%CI) | P |
| T90% | -0.06 (-0.12 ~ -0.01) | **0.039** |  | -0.14 (-0.24 ~ -0.04) | **0.007** |  | -0.13 (-0.24 ~ -0.03) | **0.013** |
| AHI | -0.00 (-0.00 ~ 0.00) | 0.085 |  | -0.00 (-0.00 ~ 0.00) | 0.097 |  | -0.00 (-0.00 ~ 0.00) | 0.075 |
| Lowest SPO2 | 0.00 (-0.00 ~ 0.00) | 0.797 |  | -0.00 (-0.00 ~ 0.00) | 0.079 |  | -0.00 (-0.00 ~ 0.00) | 0.156 |
| Mean SPO2 | 0.00 (-0.00 ~ 0.00) | 0.547 |  | -0.00 (-0.01 ~ 0.00) | 0.225 |  | -0.00 (-0.01 ~ 0.00) | 0.197 |

Model 1: was adjusted for the other three indicators except for the indicator in the unadjusted mode.

Model 2: was adjusted for variables included in Model 1, age, BMI, waist circumference and metabolic syndrome.

**Supplementary Figure 1**


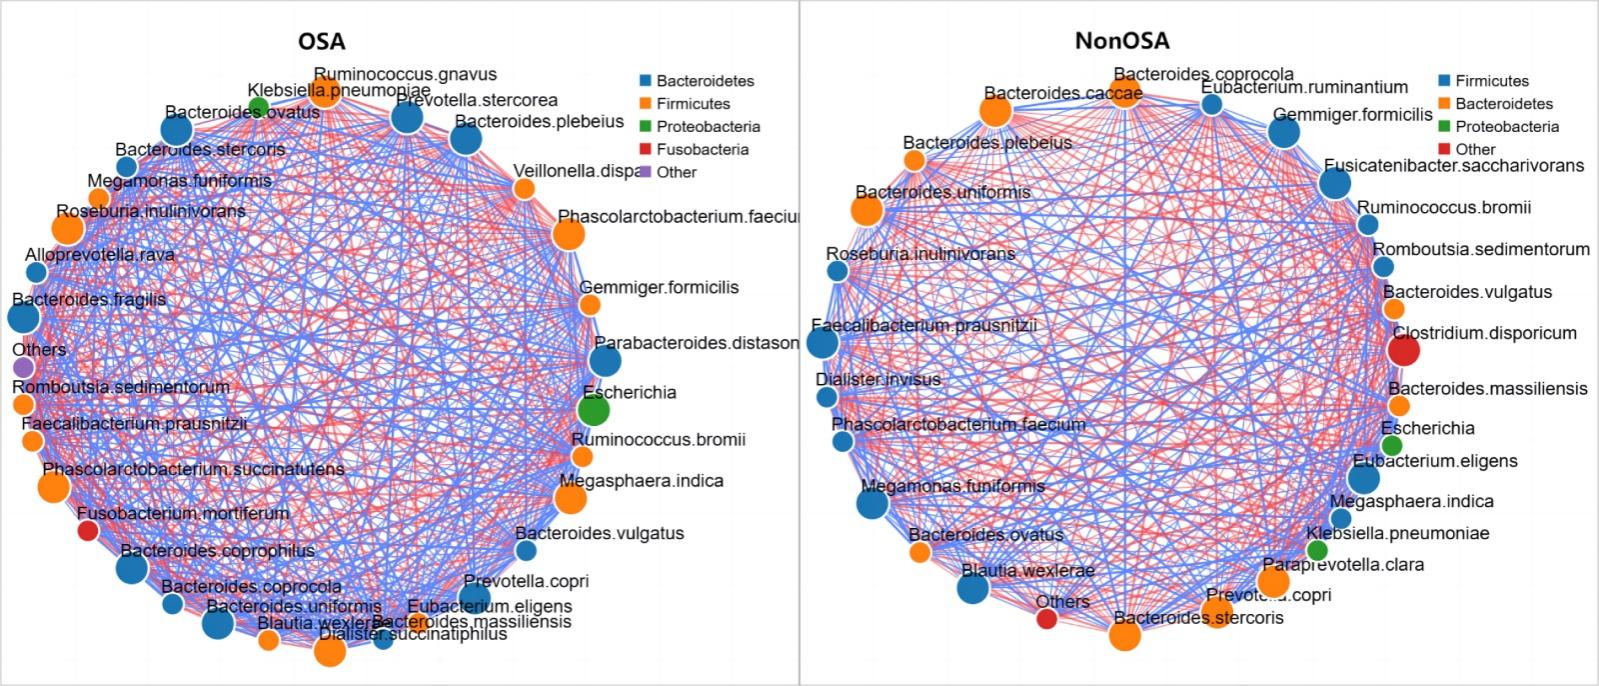


**s-Figure 1** Strengths of the correlation between abundant fecal microbiota in the OSA patients and the healthy controls. Correlation network of the abundant gut microbiota in the healthy controls and the OSA patients. The correlation coefficients were calculated with the Sparse Correlations for Compositional (SparCC) data algorithm. Cytoscape version 3.4.0 was used for network construction. The red and blue lines represent positive and negative correlations, respectively. The correlation network became complex in OSA patients.
